# Supplementary material for: Effect of the cation size on the framework structures of magnesium tungstate, A4Mg(WO4)3(A = Na, K), R2Mg2(WO4)3(R = Rb, Cs)
Source: Royal Society of Chemistry journal article supplement (doi:10.1039/c5dt00332f), 2015-01-01
Supplement: c5dt00332f2.pdf [file c5dt00332f2.pdf]

**Effect of Cation Size on the Framework Structures of Magnesium Tungstate,**

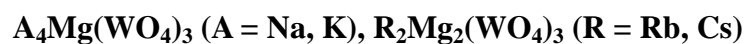

**Shujuan Han,<sup>a</sup> Ying Wang,<sup>a,b</sup> Qun Jing,<sup>a,b</sup> Hongping Wu,<sup>a</sup> Shilie Pan<sup>\*a</sup> and**

**Zhихua Yang<sup>\*a</sup>**

*<sup>a</sup>Key Laboratory of Functional Materials and Devices for Special Environments of CAS, Xinjiang*

*Technical Institute of Physics & Chemistry of CAS, Xinjiang Key Laboratory of Electronic*

*Information Materials and Devices, 40-1 South Beijing Road, Urumqi 830011, China*

*<sup>b</sup>University of Chinese Academy of Sciences, Beijing 100049, China*

*\*To whom correspondence should be addressed. E-mail: slpan@ms.xjb.ac.cn (Shilie*

*Pan); zhyang@ms.xjb.ac.cn (Zhихua Yang)*

**Table S1.** Atomic coordinates ( $\times 10^4$ ) and equivalent isotropic displacement parameters ( $\text{\AA}^2 \times 10^3$ ) for  $\text{Na}_4\text{Mg}(\text{WO}_4)_3$ ,  $\text{K}_4\text{Mg}(\text{WO}_4)_3$ ,  $\text{Rb}_2\text{Mg}_2(\text{WO}_4)_3$  and  $\text{Cs}_2\text{Mg}_2(\text{WO}_4)_3$ .  $U_{\text{eq}}$  is defined as one third of the trace of the orthogonalized  $U_{ij}$  tensor.

| Atoms                                 | x       | y        | z       | $U_{\text{eq}}$ | OCC (<1) | BVS  |
|---------------------------------------|---------|----------|---------|-----------------|----------|------|
| $\text{Na}_4\text{Mg}(\text{WO}_4)_3$ |         |          |         |                 |          |      |
| W(1)                                  | 5000    | 7872(1)  | 2500    | 21(1)           |          | 6.10 |
| W(2)                                  | 7721(1) | 1101(1)  | 3779(1) | 21(1)           |          | 6.03 |
| Na(1)                                 | 5000    | 0        | 0       | 45(1)           |          | 0.72 |
| Na(2)                                 | 5000    | 7705(2)  | -2500   | 20(1)           |          | 1.17 |
| Na(3)                                 | 0       | 200(30)  | 7500    | 55(5)           | 0.45     | 0.62 |
| Na(4)                                 | 0       | 9800(30) | 7500    | 55(5)           | 0.55     | 0.66 |
| Mg(1)                                 | 2897(2) | 6579(2)  | 1230(3) | 18(1)           | 0.5      | 1.72 |
| Na(5)                                 | 2897(2) | 6579(2)  | 1230(3) | 18(1)           | 0.5      |      |
| O(1)                                  | 6268(4) | 858(3)   | 3170(7) | 30(1)           |          | 2.00 |
| O(2)                                  | 4625(4) | 7150(3)  | 292(6)  | 28(1)           |          | 2.02 |
| O(3)                                  | 8310(4) | 1706(3)  | 6103(6) | 31(1)           |          | 2.12 |
| O(4)                                  | 7848(4) | 1809(3)  | 1784(7) | 37(1)           |          | 1.92 |
| O(5)                                  | 8486(4) | 9974(3)  | 4024(7) | 39(1)           |          | 2.26 |
| O(6)                                  | 3912(4) | 8690(3)  | 2445(8) | 44(1)           |          | 2.03 |
| $\text{K}_4\text{Mg}(\text{WO}_4)_3$  |         |          |         |                 |          |      |
| W(1)                                  | 8782(1) | 3563(1)  | 1860(1) | 19(1)           |          | 6.17 |
| W(2)                                  | 7625(1) | -1886(1) | 2558(1) | 20(1)           |          | 6.04 |
| W(3)                                  | 3811(1) | 1497(1)  | 3887(1) | 27(1)           |          | 5.96 |
| K(1)                                  | 3513(3) | 4325(2)  | 1129(2) | 27(1)           |          | 1.32 |
| K(2)                                  | 0       | 0        | 0       | 32(1)           |          | 1.09 |
| K(3)                                  | 2204(3) | 7615(2)  | 2239(2) | 24(1)           |          | 1.16 |
| K(4)                                  | 2551(3) | 4792(2)  | 5264(2) | 35(1)           |          | 0.86 |
| K(5)                                  | 5000    | 0        | 0       | 39(1)           |          | 0.83 |
| Mg(1)                                 | 8431(5) | 1219(3)  | 4479(3) | 37(1)           |          | 1.96 |
| O(1)                                  | 7566(8) | -90(6)   | 2683(6) | 27(1)           |          | 2.00 |
| O(2)                                  | 5538(9) | -3080(7) | 2680(6) | 32(2)           |          | 1.91 |
| O(3)                                  | 3890(8) | 3248(7)  | 3676(6) | 32(1)           |          | 2.14 |
| O(4)                                  | 921(9)  | 4880(7)  | 2096(7) | 36(2)           |          | 2.13 |

|                                         |          |          |         |       |      |
|-----------------------------------------|----------|----------|---------|-------|------|
| O(5)                                    | 9645(8)  | -2212(7) | 3715(6) | 30(1) | 2.07 |
| O(6)                                    | 6114(9)  | 1502(7)  | 4916(7) | 38(2) | 2.02 |
| O(7)                                    | 8871(10) | 3000(8)  | 3531(7) | 43(2) | 1.83 |
| O(8)                                    | 8443(9)  | 2162(8)  | 563(7)  | 42(2) | 2.05 |
| O(9)                                    | 3216(9)  | 525(7)   | 2217(6) | 33(2) | 1.94 |
| O(10)                                   | 8017(10) | -750(8)  | 5337(8) | 48(2) | 1.63 |
| O(11)                                   | 7760(10) | -2189(8) | 869(8)  | 49(2) | 2.09 |
| O(12)                                   | 6964(11) | 4346(9)  | 1355(8) | 52(2) | 2.00 |
| $\text{Rb}_2\text{Mg}_2(\text{WO}_4)_3$ |          |          |         |       |      |
| W(1)                                    | 7757(1)  | 6269(1)  | 507(1)  | 10(1) | 6.25 |
| Rb(1)                                   | 7950(1)  | 2950(1)  | 2050(1) | 41(1) | 0.63 |
| Rb(2)                                   | 4294(1)  | 5706(1)  | 706(1)  | 24(1) | 0.86 |
| Mg(1)                                   | 1360(2)  | 1360(2)  | 1360(2) | 12(1) | 2.20 |
| Mg(2)                                   | 5875(2)  | 9125(2)  | 875(2)  | 11(1) | 2.22 |
| O(1)                                    | 9285(5)  | 6478(7)  | -15(6)  | 39(2) | 2.03 |
| O(2)                                    | 6962(6)  | 5162(7)  | -387(6) | 43(2) | 2.08 |
| O(3)                                    | 6992(7)  | 7676(7)  | 291(8)  | 54(2) | 2.11 |
| O(4)                                    | 7683(8)  | 5784(7)  | 2065(5) | 49(2) | 2.00 |
| $\text{Cs}_2\text{Mg}_2(\text{WO}_4)_3$ |          |          |         |       |      |
| W(1)                                    | 1984(1)  | 8760(1)  | 9743(1) | 8(1)  | 6.11 |
| Cs(1)                                   | 417(1)   | 5417(1)  | 9583(1) | 26(1) | 0.84 |
| Cs(2)                                   | 3220(1)  | 1780(1)  | 8220(1) | 17(1) | 1.16 |
| Mg(1)                                   | -1138(2) | 8863(2)  | 8863(2) | 9(1)  | 2.11 |
| Mg(2)                                   | 3370(2)  | 8370(2)  | 6630(2) | 9(1)  | 2.07 |
| O(1)                                    | 2510(4)  | 8966(4)  | 8220(4) | 19(1) | 2.00 |
| O(2)                                    | 2217(4)  | 150(4)   | 533(4)  | 21(1) | 2.07 |
| O(3)                                    | 431(4)   | 8286(4)  | 9804(4) | 20(1) | 2.00 |
| O(4)                                    | 2859(4)  | 7628(4)  | 509(4)  | 20(1) | 1.72 |

**Table S2.** Selected bond lengths (Å) and angles (deg.) for Na<sub>4</sub>Mg(WO<sub>4</sub>)<sub>3</sub>.

|                     |            |                       |            |
|---------------------|------------|-----------------------|------------|
| W(1)-O(6)#1         | 1.756(5)   | Na(2)-O(2)            | 2.353(4)   |
| W(1)-O(6)           | 1.756(5)   | Na(2)-O(3)#9          | 2.408(4)   |
| W(1)-O(2)           | 1.774(4)   | Na(2)-O(3)#10         | 2.408(4)   |
| W(1)-O(2)#1         | 1.774(4)   | Na(2)-O(1)#7          | 2.457(5)   |
| W(2)-O(1)           | 1.748(4)   | Na(2)-O(1)#6          | 2.457(5)   |
| W(2)-O(3)           | 1.759(4)   | Na(4)-O(5)#11         | 2.524(6)   |
| W(2)-O(4)           | 1.785(5)   | Na(4)-O(5)            | 2.524(6)   |
| W(2)-O(5)           | 1.786(4)   | Na(4)-O(5)#4          | 2.550(7)   |
| Na(1)-O(1)          | 2.527(4)   | Na(4)-O(5)#13         | 2.550(7)   |
| Na(1)-O(1)#6        | 2.527(4)   | Mg(1)-O(6)#3          | 2.146(6)   |
| Na(1)-O(6)#7        | 2.559(5)   | Mg(1)-O(3)#9          | 2.174(5)   |
| Na(1)-O(6)#1        | 2.559(5)   | Mg(1)-O(2)            | 2.182(5)   |
| Na(1)-O(1)#7        | 2.688(5)   | Mg(1)-O(4)#15         | 2.212(5)   |
| Na(1)-O(1)#1        | 2.688(5)   | Mg(1)-O(5)#16         | 2.226(5)   |
| Na(2)-O(2)#8        | 2.353(4)   | Mg(1)-O(4)#6          | 2.362(5)   |
|                     |            |                       |            |
| O(6)#1-W(1)-O(6)    | 101.2(4)   | O(3)#9-Na(2)-O(3)#10  | 111.2(2)   |
| O(6)#1-W(1)-O(2)    | 108.4(2)   | O(2)#8-Na(2)-O(1)#7   | 95.71(16)  |
| O(6)-W(1)-O(2)      | 112.8(2)   | O(2)#8-Na(2)-O(1)#6   | 114.37(16) |
| O(1)-W(2)-O(3)      | 110.9(2)   | O(2)-Na(2)-O(1)#6     | 95.71(16)  |
| O(1)-W(2)-O(4)      | 107.6(2)   | O(3)#9-Na(2)-O(1)#6   | 87.66(15)  |
| O(3)-W(2)-O(4)      | 112.1(2)   | O(3)#10-Na(2)-O(1)#6  | 160.19(17) |
| O(1)-W(2)-O(5)      | 109.8(2)   | O(1)#7-Na(2)-O(1)#6   | 74.5(2)    |
| O(3)-W(2)-O(5)      | 106.8(2)   | O(6)#3-Mg(1)-O(3)#9   | 102.9(2)   |
| O(1)-Na(1)-O(1)#6   | 180.000(1) | O(6)#3-Mg(1)-O(2)     | 166.88(19) |
| O(1)-Na(1)-O(6)#7   | 108.22(15) | O(3)#9-Mg(1)-O(2)     | 83.67(17)  |
| O(1)#6-Na(1)-O(6)#7 | 71.78(15)  | O(6)#3-Mg(1)-O(4)#15  | 90.5(2)    |
| O(1)#6-Na(1)-O(1)#7 | 69.45(17)  | O(3)#9-Mg(1)-O(4)#15  | 162.9(2)   |
| O(6)#7-Na(1)-O(1)#7 | 102.06(17) | O(2)-Mg(1)-O(4)#15    | 81.19(18)  |
| O(6)#1-Na(1)-O(1)#7 | 77.94(17)  | O(2)-Mg(1)-O(5)#16    | 93.32(18)  |
| O(2)#8-Na(2)-O(2)   | 142.5(3)   | O(4)#15-Mg(1)-O(5)#16 | 100.69(19) |
| O(2)#8-Na(2)-O(3)#9 | 83.78(16)  | O(6)#3-Mg(1)-O(4)#6   | 78.16(18)  |

Symmetry transformations used to generate equivalent atoms:

#1 -x+1, y, -z+1/2    #2 x+1/2, -y+3/2, z+1/2    #3 -x+1/2, -y+3/2, -z    #4 -x+2, -y+2, -z+1  
#5 x+1/2, y+1/2, z+1    #6 -x+1, -y+2, -z    #7 x, -y+2, z-1/2    #8 -x+1, y, -z-1/2  
#9 x-1/2, y-1/2, z-1    #10 -x+3/2, y-1/2, -z+1/2    #11 -x+2, y, -z+3/2    #12 -x+2, -y+2, -z+2  
#13 x, -y+2, z+1/2    #14 -x+3/2, -y+3/2, -z+1    #15 x-1/2, y-1/2, z    #16 x-1/2, -y+3/2, z-1/2  
#17 x+1/2, y+1/2, z

**Table S3.** Selected bond lengths (Å) and angles (deg.) for  $K_4Mg(WO_4)_3$ .

|                      |           |                      |            |
|----------------------|-----------|----------------------|------------|
| W(1)-O(4)            | 1.749(7)  | K(3)-O(8)#3          | 2.745(7)   |
| W(1)-O(12)           | 1.750(7)  | K(3)-O(6)#2          | 2.755(7)   |
| W(1)-O(8)            | 1.759(7)  | K(3)-O(2)#9          | 2.766(6)   |
| W(1)-O(7)            | 1.786(7)  | K(3)-O(9)#9          | 2.779(7)   |
| W(2)-O(11)           | 1.743(7)  | K(3)-O(5)#12         | 2.822(6)   |
| W(2)-O(2)            | 1.762(6)  | K(4)-O(3)            | 2.735(6)   |
| W(2)-O(5)            | 1.779(6)  | K(4)-O(3)#2          | 2.766(7)   |
| W(2)-O(1)            | 1.792(6)  | K(4)-O(7)#8          | 2.888(7)   |
| W(3)-O(3)            | 1.747(6)  | K(4)-O(7)#2          | 3.037(7)   |
| W(3)-O(9)            | 1.756(6)  | K(4)-O(2)#4          | 3.055(7)   |
| W(3)-O(6)            | 1.782(6)  | K(4)-O(5)#4          | 3.066(7)   |
| W(3)-O(10)#4         | 1.811(7)  | K(4)-O(4)#8          | 3.084(7)   |
| K(1)-O(11)#7         | 2.594(8)  | K(5)-O(8)            | 2.809(7)   |
| K(1)-O(12)           | 2.605(8)  | K(5)-O(8)#7          | 2.809(7)   |
| K(1)-O(4)#8          | 2.628(6)  | K(5)-O(1)#7          | 2.874(6)   |
| K(1)-O(2)#9          | 2.730(7)  | K(5)-O(1)            | 2.874(6)   |
| K(1)-O(3)            | 2.796(7)  | K(5)-O(9)            | 3.023(6)   |
| K(1)-O(12)#3         | 2.864(8)  | K(5)-O(9)#7          | 3.023(6)   |
| K(2)-O(9)#10         | 2.720(6)  | Mg(1)-O(5)#13        | 1.982(7)   |
| K(2)-O(9)            | 2.720(6)  | Mg(1)-O(1)           | 1.989(6)   |
| K(2)-O(11)#7         | 2.738(8)  | Mg(1)-O(6)           | 2.046(7)   |
| K(2)-O(11)#8         | 2.738(8)  | Mg(1)-O(7)           | 2.047(8)   |
| K(2)-O(8)#8          | 2.831(7)  | Mg(1)-O(10)          | 2.159(8)   |
| K(2)-O(8)#7          | 2.831(7)  | Mg(1)-O(10)          | 2.862      |
| K(3)-O(4)#8          | 2.601(7)  |                      |            |
| O(4)-W(1)-O(12)      | 107.4(3)  | O(9)#10-K(2)-O(9)    | 180.0(2)   |
| O(11)-W(2)-O(2)      | 109.3(3)  | O(9)#10-K(2)-O(11)#8 | 81.9(2)    |
| O(11)-W(2)-O(5)      | 106.1(3)  | O(6)#2-K(3)-O(2)#9   | 78.94(19)  |
| O(3)-W(3)-O(9)       | 108.2(3)  | O(11)#7-K(2)-O(11)#8 | 180.0(3)   |
| O(3)-W(3)-O(6)       | 107.8(3)  | O(11)#7-K(2)-O(8)#7  | 99.1(2)    |
| O(9)-W(3)-O(6)       | 109.5(3)  | O(11)#8-K(2)-O(8)#7  | 80.9(2)    |
| O(11)#7-K(1)-O(12)   | 89.6(2)   | O(8)#3-K(3)-O(6)#2   | 155.7(2)   |
| O(4)#8-K(1)-O(2)#9   | 80.1(2)   | O(8)#3-K(3)-O(2)#9   | 96.90(19)  |
| O(12)-K(1)-O(3)      | 88.8(2)   | O(4)#8-K(3)-O(9)#9   | 174.2(2)   |
| O(4)#8-K(1)-O(3)     | 73.79(19) | O(6)#2-K(3)-O(11)#12 | 116.28(19) |
| O(11)#7-K(1)-O(12)#3 | 77.1(2)   | O(9)#9-K(3)-O(11)#12 | 83.44(19)  |

Symmetry transformations used to generate equivalent atoms:

#1  $x+1, y, z$     #2  $-x+1, -y+1, -z+1$     #3  $-x+1, -y+1, -z$     #4  $-x+1, -y, -z+1$   
#5  $x+1, y-1, z$     #6  $x, y-1, z$     #7  $-x+1, -y, -z$     #8  $x-1, y, z$     #9  $x, y+1, z$   
#10  $-x, -y, -z$     #11  $-x, -y+1, -z$     #12  $x-1, y+1, z$     #13  $-x+2, -y, -z+1$

**Table S4.** Selected bond lengths (Å) and angles (deg.) for Rb<sub>2</sub>Mg<sub>2</sub>(WO<sub>4</sub>)<sub>3</sub>.

|                     |            |                       |            |
|---------------------|------------|-----------------------|------------|
| W(1)-O(3)           | 1.739(7)   | Rb(2)-O(3)#8          | 3.213(8)   |
| W(1)-O(1)           | 1.753(6)   | Rb(2)-O(3)#9          | 3.213(8)   |
| W(1)-O(2)           | 1.755(6)   | Rb(2)-O(3)#10         | 3.213(8)   |
| W(1)-O(4)           | 1.759(5)   | Rb(2)-O(3)#11         | 3.624(8)   |
| Rb(1)-O(4)#3        | 3.065(8)   | Rb(2)-O(3)            | 3.624(8)   |
| Rb(1)-O(4)#4        | 3.065(8)   | Rb(2)-O(3)#6          | 3.624(8)   |
| Rb(1)-O(4)          | 3.065(8)   | Mg(1)-O(2)#12         | 2.050(7)   |
| Rb(1)-O(2)#5        | 3.428(7)   | O(2)-Mg(1)#20         | 2.050(7)   |
| Rb(1)-O(2)#6        | 3.428(7)   | Mg(1)-O(2)#7          | 2.050(7)   |
| Rb(1)-O(2)#7        | 3.428(7)   | Mg(1)-O(4)#13         | 2.078(7)   |
| Rb(1)-O(3)#7        | 3.554(8)   | Mg(1)-O(4)#3          | 2.078(7)   |
| Rb(1)-O(3)#5        | 3.554(8)   | Mg(1)-O(4)#14         | 2.078(7)   |
| Rb(1)-O(3)#6        | 3.554(8)   | Mg(2)-O(1)#15         | 2.052(6)   |
| Rb(2)-O(1)#8        | 3.121(8)   | Mg(2)-O(1)#16         | 2.052(6)   |
| Rb(2)-O(1)#9        | 3.121(8)   | Mg(2)-O(1)#9          | 2.052(6)   |
| Rb(2)-O(1)#10       | 3.121(8)   | Mg(2)-O(3)#17         | 2.068(7)   |
| Rb(2)-O(2)#11       | 3.159(7)   | Mg(2)-O(3)            | 2.068(7)   |
| Rb(2)-O(2)#6        | 3.159(7)   | Mg(2)-O(3)#8          | 2.068(7)   |
| Rb(2)-O(2)          | 3.159(7)   |                       |            |
| O(3)-W(1)-O(1)      | 106.8(4)   | O(4)-Rb(1)-O(3)#5     | 100.67(16) |
| O(1)-W(1)-O(4)      | 112.7(3)   | O(3)#7-Rb(1)-O(3)#5   | 80.5(2)    |
| O(4)#3-Rb(1)-O(4)#4 | 95.62(19)  | O(4)#3-Rb(1)-O(3)#6   | 163.68(19) |
| O(4)#4-Rb(1)-O(2)#5 | 148.96(19) | O(2)#7-Rb(1)-O(3)#6   | 126.99(17) |
| O(4)-Rb(1)-O(2)#5   | 53.70(15)  | O(3)#7-Rb(1)-O(3)#6   | 80.5(2)    |
| O(4)#3-Rb(1)-O(2)#6 | 148.96(19) | O(3)#5-Rb(1)-O(3)#6   | 80.5(2)    |
| O(4)#4-Rb(1)-O(2)#6 | 53.70(15)  | O(3)-Rb(2)-O(3)#6     | 116.25(7)  |
| O(4)-Rb(1)-O(2)#6   | 84.27(18)  | O(2)#12-Mg(1)-O(2)#4  | 90.3(3)    |
| O(2)#5-Rb(1)-O(2)#6 | 118.89(4)  | O(2)#12-Mg(1)-O(2)#7  | 90.3(3)    |
| O(4)#3-Rb(1)-O(2)#7 | 53.70(15)  | O(2)#4-Mg(1)-O(2)#7   | 90.3(3)    |
| O(4)#4-Rb(1)-O(2)#7 | 84.27(18)  | O(2)#12-Mg(1)-O(4)#13 | 89.2(3)    |
| O(4)-Rb(1)-O(2)#7   | 148.96(19) | O(2)#4-Mg(1)-O(4)#13  | 91.2(2)    |
| O(4)-Rb(1)-O(3)#7   | 163.68(19) | O(4)#13-Mg(1)-O(4)#3  | 89.3(3)    |
| O(2)#5-Rb(1)-O(3)#7 | 126.99(17) | O(2)#12-Mg(1)-O(4)#14 | 91.2(2)    |
| O(4)#4-Rb(1)-O(3)#5 | 163.68(19) | O(4)#3-Mg(1)-O(4)#14  | 89.3(3)    |

Symmetry transformations used to generate equivalent atoms:

#1  $x+1/2, -y+3/2, -z$  #2  $-x+3/2, -y+1, z-1/2$  #3  $y+1/2, -z+1/2, -x+1$  #4  $-z+1, x-1/2, -y+1/2$   
#5  $-x+3/2, -y+1, z+1/2$  #6  $-z+1/2, -x+1, y-1/2$  #7  $-y+3/2, -z, x-1/2$  #8  $z+1/2, -x+3/2, -y+1$   
#9  $x-1/2, -y+3/2, -z$  #10  $y-1/2, -z+1/2, -x+1$  #11  $-y+1, z+1/2, -x+1/2$  #12  $x+1/2, -y+1/2, -z$   
#13  $-z+3/2, -x+1, y-1/2$  #14  $-x+2, y-1/2, -z+1/2$  #15  $y, z+1, x-1$  #16  $-z+1/2, -x+2, y-1/2$   
#17  $-y+3/2, -z+1, x-1/2$  #18  $-x+1, y+1/2, -z+1/2$  #19  $-x+2, y+1/2, -z+1/2$  #20  $x-1/2, -y+1/2, -z$

**Table S5.** Selected bond lengths (Å) and angles (deg.) for Cs<sub>2</sub>Mg<sub>2</sub>(WO<sub>4</sub>)<sub>3</sub>.

|                      |             |                       |            |
|----------------------|-------------|-----------------------|------------|
| W(1)-O(2)            | 1.758(4)    | Cs(2)-O(4)#11         | 3.239(4)   |
| W(1)-O(4)            | 1.765(4)    | Cs(2)-O(4)#12         | 3.239(4)   |
| W(1)-O(3)            | 1.767(4)    | Cs(2)-O(2)#8          | 3.266(4)   |
| W(1)-O(1)            | 1.768(4)    | Cs(2)-O(2)            | 3.266(4)   |
| Cs(1)-O(3)           | 3.131(4)    | Cs(2)-O(2)#9          | 3.266(4)   |
| Cs(1)-O(3)#3         | 3.131(4)    | Cs(2)-O(2)#11         | 3.630(4)   |
| Cs(1)-O(3)#4         | 3.131(4)    | Cs(2)-O(2)#10         | 3.630(4)   |
| Cs(1)-O(4)#5         | 3.503(4)    | Cs(2)-O(2)#12         | 3.630(4)   |
| Cs(1)-O(4)#6         | 3.503(4)    | Mg(1)-O(4)#7          | 2.071(5)   |
| Cs(1)-O(4)#7         | 3.503(4)    | Mg(1)-O(4)#13         | 2.071(5)   |
| Cs(1)-O(2)#7         | 3.538(4)    | Mg(1)-O(4)#3          | 2.071(5)   |
| Cs(1)-O(2)#6         | 3.538(4)    | Mg(1)-O(3)#14         | 2.087(5)   |
| Cs(1)-O(2)#5         | 3.538(4)    | Mg(1)-O(3)            | 2.087(5)   |
| Cs(1)-O(4)           | 3.723(4)    | Mg(1)-O(3)#10         | 2.087(5)   |
| Cs(1)-O(4)#3         | 3.723(4)    | Mg(2)-O(1)#3          | 2.070(4)   |
| Cs(1)-O(4)#4         | 3.723(4)    | Mg(2)-O(1)            | 2.070(4)   |
| Cs(2)-O(1)#8         | 3.157(5)    | Mg(2)-O(1)#4          | 2.070(4)   |
| Cs(2)-O(1)           | 3.157(5)    | Mg(2)-O(2)#9          | 2.103(5)   |
| Cs(2)-O(1)#9         | 3.157(5)    | Mg(2)-O(2)#11         | 2.103(5)   |
| Cs(2)-O(4)#10        | 3.239(4)    | Mg(2)-O(2)#17         | 2.103(5)   |
| O(2)-W(1)-O(4)       | 107.0(2)    | O(2)#8-Cs(2)-O(2)#12  | 49.93(14)  |
| O(2)#9-Cs(2)-O(2)#12 | 105.226(15) | O(2)-Cs(2)-O(2)#12    | 136.99(8)  |
| O(1)-Cs(2)-O(2)#9    | 52.10(11)   | O(2)#11-Cs(2)-O(2)#12 | 115.85(5)  |
| O(4)#12-Cs(2)-O(2)#8 | 92.62(11)   | O(4)#7-Mg(1)-O(3)     | 91.93(16)  |
| O(1)#8-Cs(2)-O(2)    | 52.10(11)   | O(4)#13-Mg(1)-O(3)    | 176.66(18) |
| O(1)-Cs(2)-O(2)      | 52.55(11)   | O(4)#3-Mg(1)-O(3)     | 87.49(18)  |
| O(1)#9-Cs(2)-O(2)    | 120.83(11)  | O(3)#14-Mg(1)-O(3)    | 89.52(19)  |
| O(4)#10-Cs(2)-O(2)   | 92.62(11)   | O(4)#7-Mg(1)-O(3)#10  | 176.66(18) |
| O(4)#12-Cs(2)-O(2)   | 135.01(11)  | O(4)#3-Mg(1)-O(3)#10  | 91.93(16)  |
| O(2)#8-Cs(2)-O(2)    | 91.18(11)   | O(3)#14-Mg(1)-O(3)#10 | 89.52(19)  |
| O(1)#8-Cs(2)-O(2)#9  | 120.83(11)  | O(3)-Mg(1)-O(3)#10    | 89.52(19)  |
| O(1)#9-Cs(2)-O(2)#9  | 52.55(11)   | O(1)#3-Mg(2)-O(1)     | 91.4(2)    |
| O(4)#10-Cs(2)-O(2)#9 | 135.01(12)  | O(1)#3-Mg(2)-O(1)#4   | 91.4(2)    |

Symmetry transformations used to generate equivalent atoms:

#1 -x+1/2, -y+2, z+1/2 #2 x+1/2, -y+3/2, -z+2 #3 -z+1, x+1/2, -y+3/2 #4 y-1/2, -z+3/2, -x+1  
#5 -y+1, z-1/2, -x+3/2 #6 z-1, x, y #7 x-1/2, -y+3/2, -z+2 #8 z-1/2, -x+3/2, -y+2  
#9 -y+3/2, -z+2, x+1/2 #10 z-1, x+1, y #11 -x+1/2, -y+2, z-1/2 #12 y-1/2, -z+5/2, -x+1  
#13 -y+1/2, -z+2, x+1/2 #14 y-1, z, x+1 #15 -x, y-1/2, -z+3/2 #16 -x, y+1/2, -z+3/2  
#17 -z+3/2, -x+1, y-1/2 #18 -x+1, y-1/2, -z+3/2

**Figure S1.** Experimental and calculated XRD patterns of the  $\text{Na}_4\text{Mg}(\text{WO}_4)_3$ ,  $\text{K}_4\text{Mg}(\text{WO}_4)_3$ ,  $\text{Rb}_2\text{Mg}_2(\text{WO}_4)_3$  and  $\text{Cs}_2\text{Mg}_2(\text{WO}_4)_3$  crystals.

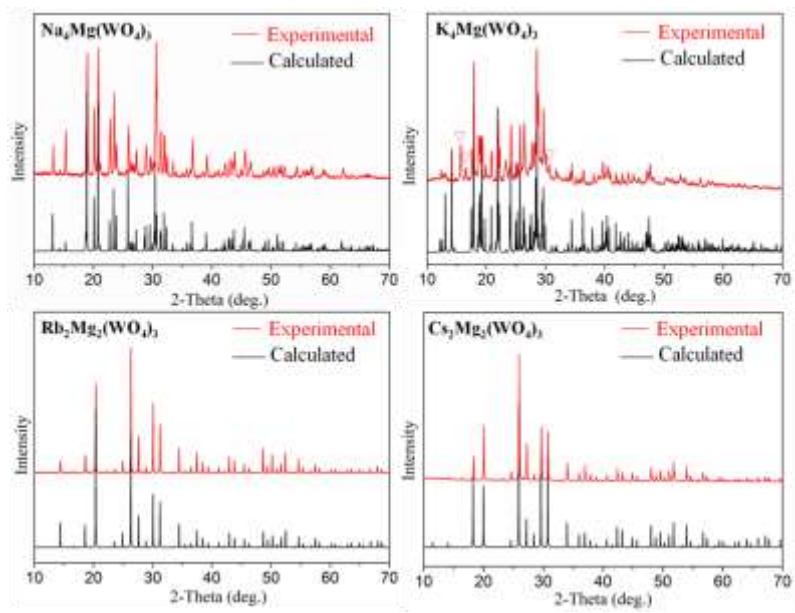



**Figure S2.** Coordination environments of the Na atoms in  $\text{Na}_4\text{Mg}(\text{WO}_4)_3$ .

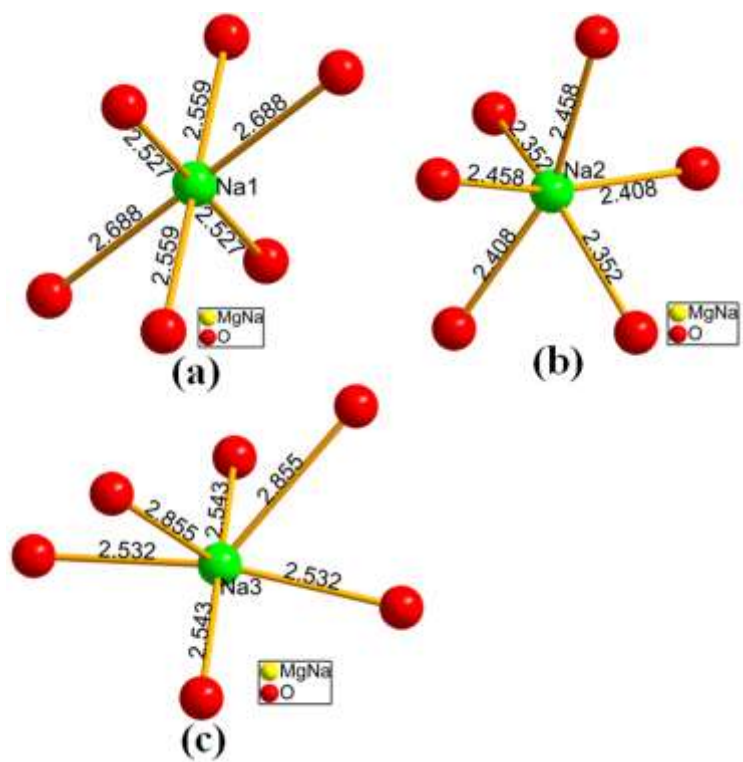

**Figure S3.** The  $(\text{Mg}/\text{Na})_2\text{O}_{10}$  dimers surrounded by eight  $\text{WO}_4$  tetrahedra in  $\text{Na}_4\text{Mg}(\text{WO}_4)_3$ .

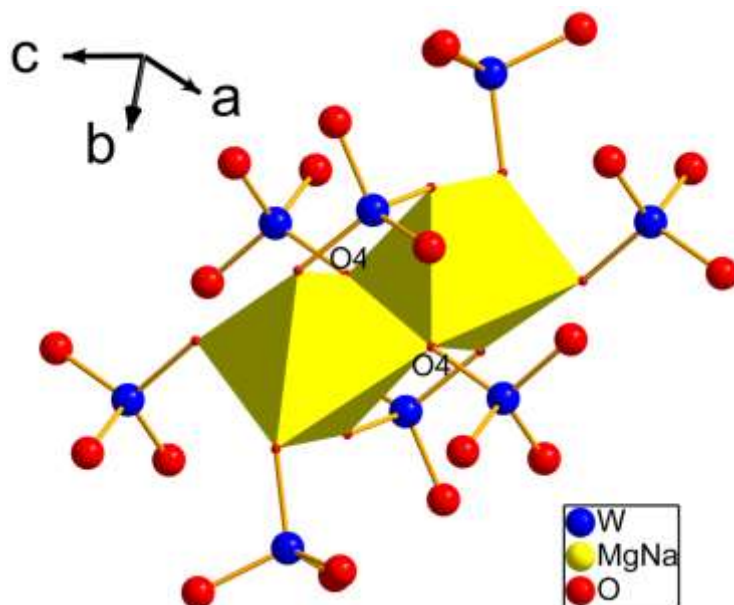

**Figure S4.** Coordination environments of the K atoms in  $K_4Mg(WO_4)_3$ .

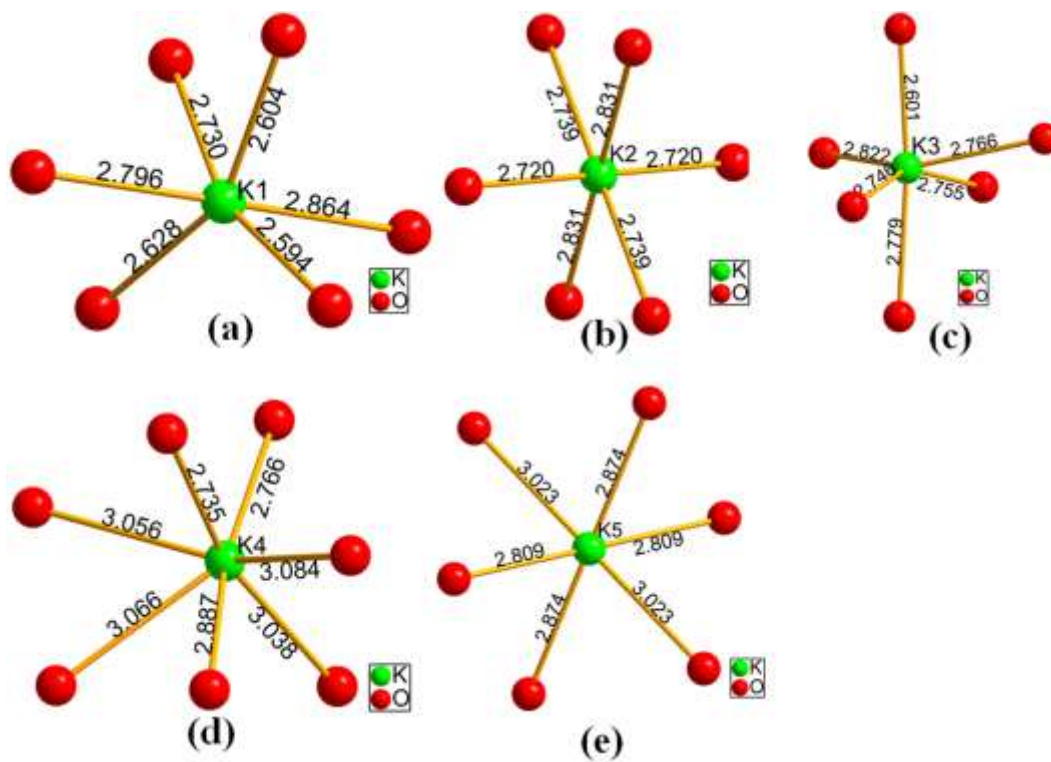

**Figure S5.** Coordination environments of the Cs and Rb atoms in  $\text{Cs}_2\text{Mg}_2(\text{WO}_4)_3$  and  $\text{Rb}_2\text{Mg}_2(\text{WO}_4)_3$ , respectively.

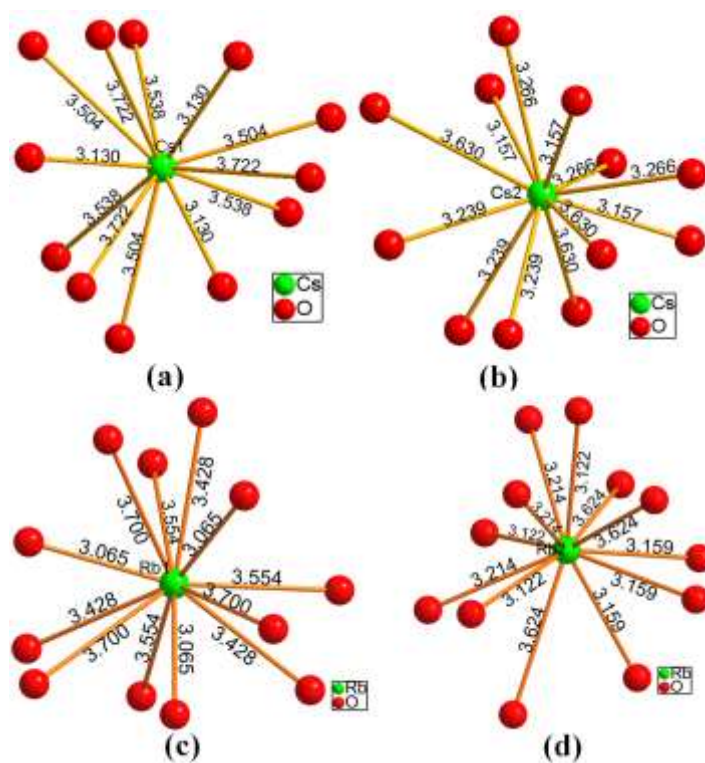

**Figure S6.** The infrared spectra of  $\text{Na}_4\text{Mg}(\text{WO}_4)_3$ ,  $\text{K}_4\text{Mg}(\text{WO}_4)_3$ ,  $\text{Rb}_2\text{Mg}_2(\text{WO}_4)_3$  and  $\text{Cs}_2\text{Mg}_2(\text{WO}_4)_3$ .

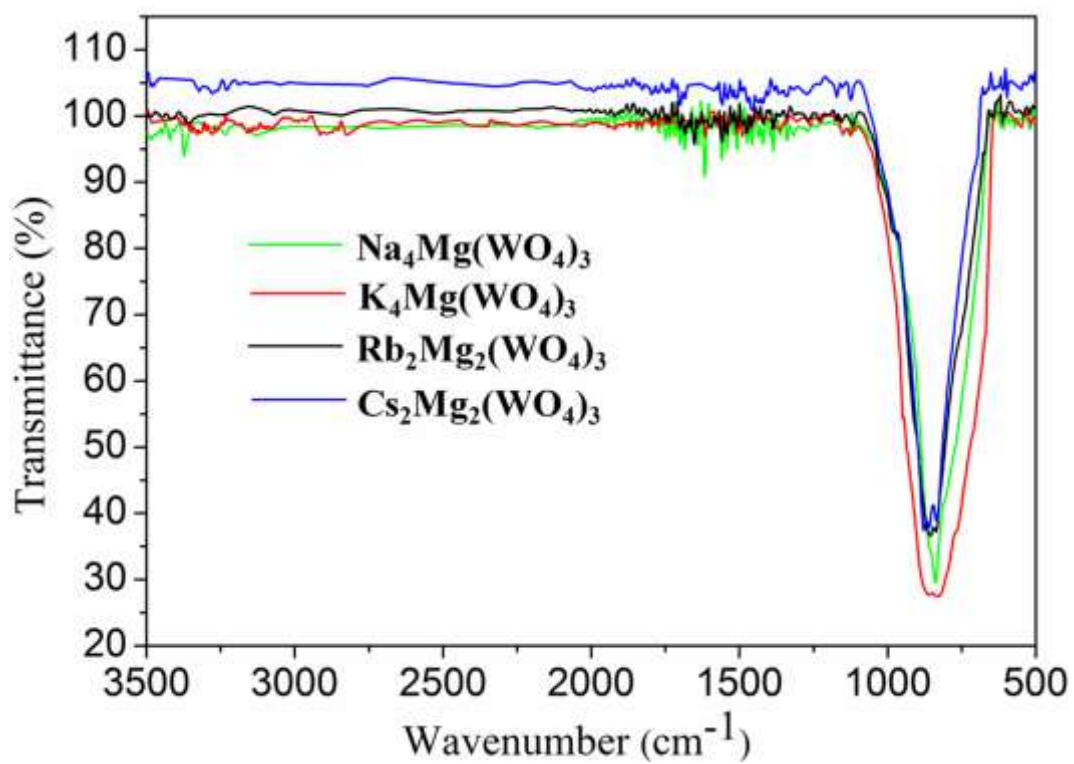

**Figure S7.** Phase matching curve, i.e., particle size vs SHG intensity, data for  $\text{Rb}_2\text{Mg}_2(\text{WO}_4)_3$  and  $\text{Cs}_2\text{Mg}_2(\text{WO}_4)_3$ .

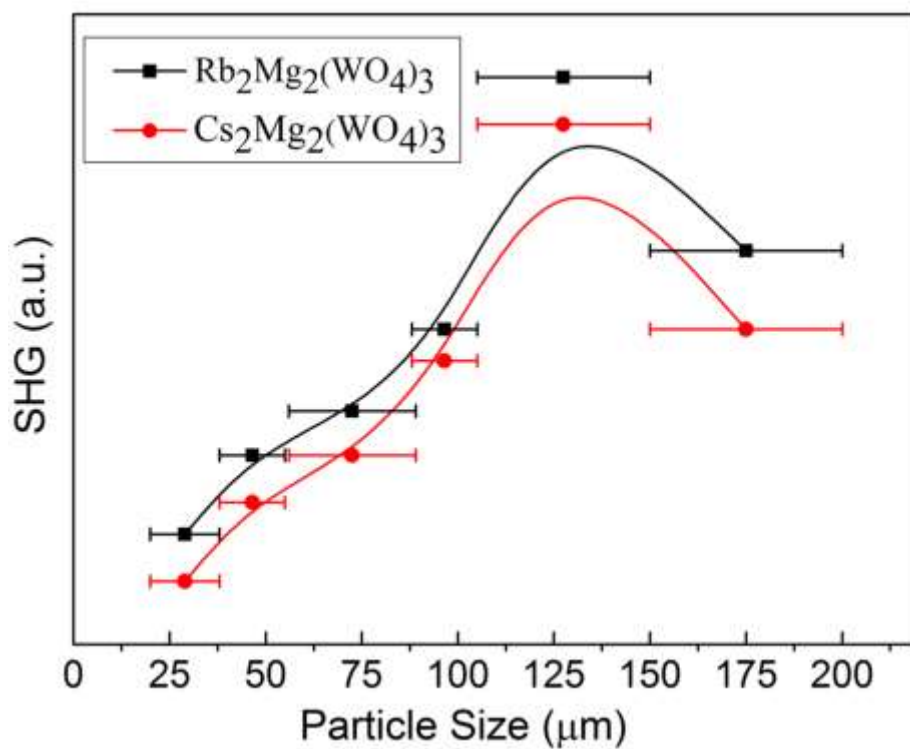

**Figure S8.** The arrangement of isolated  $\text{WO}_4$  tetrahedra.

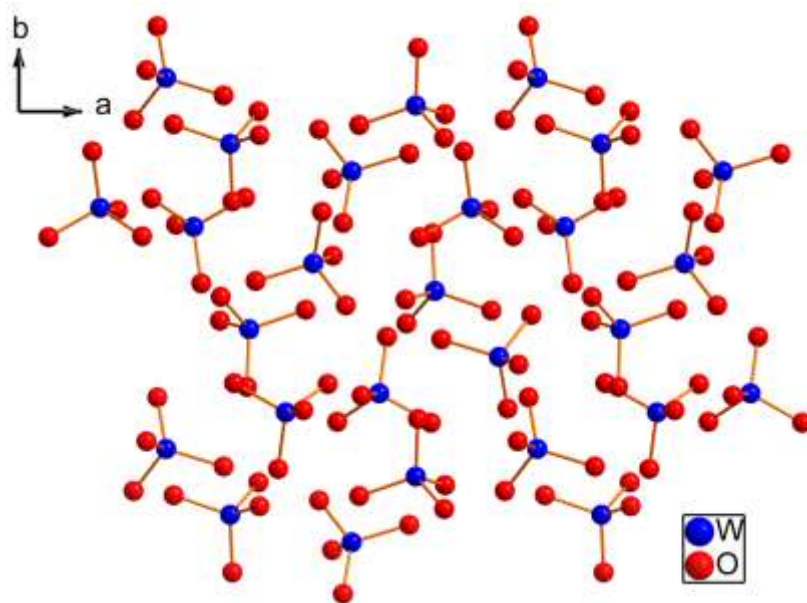

**The explanations for the bandgap difference among the title compounds and the reported compounds,  $\text{Lu}_6\text{Mo(W)O}_{12}$ ,  $\text{La}_3\text{BW}_{1-x}\text{Mo}_x\text{O}_9$  and  $\text{Y}_6\text{W(Mo)O}_{12}$**

There are many materials whose bandgap are about 1.8 ~ 3.3 eV, smaller than that of the materials described in our manuscript, while there are also many materials whose bandgap are as large as that of the materials described in our manuscript. For example, the bandgap of  $\text{Rb}_3\text{Na(WO}_4)_2$  and  $\text{Rb}_3\text{Na(MoO}_4)_2$  are 5.01 eV and 4.84 eV, respectively.<sup>1</sup>

It is interesting to analyze the contribution of different cations to the bandgap. The bandgap of different compound is mainly determined by the covalent chemical bond whose electron states site nearby the forbidden bandgap. For example, for  $\text{Rb}_3\text{Na(WO}_4)_2$ ,<sup>1</sup> the states at the top of valence band are mainly O-p states, while at the bottom of the conduction band there are mainly W-p and W-d states. Hence the bandgap of  $\text{Rb}_3\text{Na(WO}_4)_2$  is determined by W-O. Once the alkali metal cations were substituted by lanthanide, the bandgap is determined by the covalent interaction between oxygen and lanthanide. For example, the bandgap of  $\text{Lu}_6\text{WO}_{12}$  is determined by Lu-O interaction (shown in Figure 5 in Ref. 2). Owing to the relativistic effect and the electron negativity, the bandgap of compound containing Lu is generally smaller than the one containing W.

1. C. Bai, C. Lei, S. Pan, Y. Wang, Z. Yang, S. Han, H. Yu, Y. Yang, F. Zhang, *Solid State Sci.* 2014, **33**, 32.
2. H. Li, H.K. Yang, B.K. Moon, B.C. Choi, J.H. Jeong, K. Jang, H.S. Lee, S.S. Yi, *Inorg. Chem.* 2011, **50**, 12522.
